# Supplementary material
Source: PubMed Central journal article supplement (PMC5004648)
Supplement: ASN.2015050583_ASN2015050583SupplementaryData.pdf [file ASN.2015050583_ASN2015050583SupplementaryData.pdf]

Supplemental Table 1. Characteristics of patients with lower than average eGFR but smaller than average kidneys (Fig 2C, Quadrant (iii))

| Variable                             | Segment C         | Segments A,B,D    | P Value             |
|--------------------------------------|-------------------|-------------------|---------------------|
| <b>Patients (n)</b>                  | 143               | 520               |                     |
| <b>Median Age (Q1, Q3)</b>           | 36.2 (29.7, 42.4) | 37.2 (28.7, 42.7) | 0.974 <sup>1</sup>  |
| <b>Median Age Onset HTN (Q1, Q3)</b> | 30.0 (23.0, 37.0) | 30.9 (25.0, 38.0) | 0.195 <sup>1</sup>  |
| <b>Irazabal* Class (%)</b>           |                   |                   | 0.1804 <sup>2</sup> |
| Typical                              | 140 (97.9%)       | 484 (94.9%)       |                     |
| Atypical                             | 3 (2.1%)          | 26 (5.1%)         |                     |
| <b>Irazabal* Typical Sub-class</b>   |                   |                   | <.0001 <sup>3</sup> |
| A                                    | 14 (10.0%)        | 26 (5.4%)         |                     |
| B                                    | 64 (45.7%)        | 76 (15.7%)        |                     |
| C                                    | 58 (41.4%)        | 161 (33.3%)       |                     |
| D                                    | 4 (2.9%)          | 144 (29.8%)       |                     |
| E                                    | 0 (0.0%)          | 77 (15.9%)        |                     |
| <b>Gene</b>                          |                   |                   | 0.202 <sup>2</sup>  |
| NMD                                  | 11 (7.7%)         | 47 (9.0%)         |                     |
| PKD2                                 | 29 (20.3%)        | 74 (14.2%)        |                     |
| PKD1                                 | 103 (72.0%)       | 399 (76.7%)       |                     |

Q1, Q3- 1<sup>st</sup> and 3<sup>rd</sup> quartiles

\*(1) Imaging classification data was available only on 653 patients

<sup>1</sup> Wilcoxon

<sup>2</sup> Chi-squared

<sup>3</sup>Fisher's Exact

1. Irazabal MV, Rangel LJ, Bergstralh EJ, Osborn SL, Harmon AJ, Sundsbak JL, et al. Imaging Classification of Autosomal Dominant Polycystic Kidney Disease: A Simple Model for Selecting Patients for Clinical Trials. J Am Soc Nephrol. 2015 Jun 5;26(1):160-72.

Supplemental Table 2. Details of the evaluation of *PKD1* non-truncating mutations (MSG2 and MSG3)

| Mutation Type <sup>1</sup> | Codon Position | Exon | Mutation Designation (nt) | Mutation Designation (aa) | Domain/Region <sup>2</sup> | GV/GD score <sup>3</sup> | Domain score <sup>4</sup> | Structure score <sup>5</sup> | Recurrent AA score <sup>6</sup> | Splicing score <sup>7</sup> | Substitution Score <sup>8</sup> | MSG | Frequency in study <sup>9</sup> |
|----------------------------|----------------|------|---------------------------|---------------------------|----------------------------|--------------------------|---------------------------|------------------------------|---------------------------------|-----------------------------|---------------------------------|-----|---------------------------------|
| InFrame D/I                | 424            | 6    | c.1270_1276del7insC       | p.V424_E425del2:K426Q     | C-type lectin              | 8                        | 0                         | 4                            | 0                               |                             | 12                              | 2   | 1                               |
| InFrame D/I                | 687            | 10   | c.2059_2061delCTC         | p.L687del                 | ND                         | 8                        | 0                         | 2                            | 0                               |                             | 10                              | 2   | 1                               |
| Inframe D/I                | 910            | 11   | c.2729_2737del9           | p.D910_V912del3           | PKD-II                     | 14                       | 2                         | 6                            | 0                               |                             | 22                              | 2   | 1                               |
| InFrame D/I                | 1205           | 15   | c.3615_3617delTGT         | p.D1205E:V1206del         | PKD-V                      | 6                        | 4                         | 2                            | 0                               |                             | 12                              | 2   | 1                               |
| InFrame D/I                | 1270           | 15   | c.3808_3810delTGC         | p.C1270del                | PKD-VI                     | 0                        | 0                         | 2                            | 0                               |                             | 2                               | 3   | 1                               |
| InFrame D/I                | 1450           | 15   | c.4349_4351delACA         | p.N1450del                | PKD-VIII                   | 8                        | 0                         | 2                            | 0                               |                             | 10                              | 2   | 1                               |
| InFrame D/I                | 1967           | 15   | c.5899_5901delGTG         | p.V1967del                | PKD-XIV                    | 8                        | 4                         | 2                            | 0                               |                             | 14                              | 2   | 1                               |
| Inframe D/I                | 1993           | 15   | c.5976_5978delCAC         | p.F1992L, T1993del        | PKD-XV                     | 4                        | 0                         | 2                            | 0                               |                             | 6                               | 3   | 1                               |
| InFrame D/I                | 2133           | 15   | c.6397_6399delTCC         | p.F2133del                | PKD-XVI                    | 6                        | 0                         | 2                            | 0                               |                             | 8                               | 2   | 2                               |
| InFrame D/I                | 2412           | 18   | c.7236_7238delCAA         | p.N2412del                | REJ                        | 8                        | 0                         | 2                            | 0                               |                             | 10                              | 2   | 1                               |
| InFrame D/I                | 2514           | 19   | c.7529_7540dup12          | p.L2511_L2513dup3,insH    | REJ                        | 0                        | 2                         | 8                            | 0                               |                             | 10                              | 2   | 1                               |
| InFrame D/I                | 2524           | 19   | c.7570_7572delGAG         | p.E2524del                | REJ                        | 6                        | 0                         | 2                            | 0                               |                             | 8                               | 2   | 2                               |
| InFrame D/I                | 2609           | 20   | c.7826_7828delTCG         | p.I2609K:E2610del         | REJ                        | 8                        | 0                         | 2                            | 0                               |                             | 10                              | 2   | 1                               |
| InFrame D/I                | 2613           | 20   | c.7836_7838delGTT         | p.L2613del                | REJ                        | 8                        | 0                         | 2                            | 0                               |                             | 10                              | 2   | 1                               |
| InFrame D/I                | 2816           | 23   | c.8447_8452del6           | p.L2816_N2818del,insH     | GAIN                       | 12                       | 0                         | 4                            | 0                               |                             | 16                              | 2   | 1                               |
| Inframe D/I                | 2979           | 24   | c.8935_8937delTTC         | p.F2979del                | GAIN                       | 8                        | 0                         | 2                            | 0                               |                             | 10                              | 2   | 1                               |
| InFrame D/I                | 3035           | 25   | c.9103_9105delGAG         | p.E3035del                | GPS                        | 6                        | 0                         | 2                            | 0                               |                             | 8                               | 2   | 1                               |
| Inframe D/I                | 3168           | 27   | c.9502_9504delTTC         | p.F3168del                | PLAT                       | 8                        | 6                         | 2                            | 1                               |                             | 17                              | 2   | 1                               |
| Inframe D/I                | 3287           | 29   | c.9859_9861delCTC         | p.L3287del                | TM2                        | 8                        | 4                         | 2                            | 0                               |                             | 14                              | 2   | 2                               |
| InFrame D/I                | 3571           | 36   | c.10710_10715del6         | p.A3571_V3572del2         | TM4                        | 12                       | 1                         | 4                            | 0                               |                             | 17                              | 2   | 1                               |
| InFrame D/I                | 3777           | 40   | c.11330_11332delGCA       | p.S3777del                | ExL3                       | 0                        | 0                         | 2                            | 0                               |                             | 2                               | 3   | 1                               |
| InFrame D/I                | 3781           | 40   | c.11340_11345del6         | p.Y3781_D3782del2         | ExL3                       | 6                        | 2                         | 4                            | 0                               |                             | 12                              | 2   | 1                               |
| InFrame D/I                | 3782           | 40   | c.11345_11347delACG       | p.D3782del                | ExL3                       | 4                        | 0                         | 2                            | 0                               |                             | 6                               | 3   | 1                               |
| InFrame D/I                | 3782           | 40   | c.11345_11347dup          | p.D3782dup                | ExL3                       | 0                        | 0                         | 2                            | 0                               |                             | 2                               | 3   | 2                               |
| InFrame D/I                | 3782           | 40   | c.11340_11345dup6         | p.Y3781_D3782dup          | ExL3                       | 0                        | 2                         | 4                            | 0                               |                             | 6                               | 3   | 1                               |
| InFrame D/I                | 3832           | 41   | c.11493_11498dup6         | p.D3832_R3833dup          | ExL3                       | 0                        | 1                         | 4                            | 0                               |                             | 5                               | 3   | 1                               |
| Missense                   | 14             | 1    | c.41G>A                   | p.G14D                    | SP                         | -2                       | 0                         | 5                            | 0                               |                             | 3                               | 3   | 1                               |
| Missense                   | 39             | 1    | c.115T>C                  | p.C39R                    | LRR N-flank                | 8                        | 6                         | 0                            | 0                               |                             | 14                              | 2   | 1                               |
| Missense                   | 70             | 1    | c.208A>C                  | p.T70P                    | LRR N-flank                | -2                       | 0                         | 5                            | 0                               |                             | 3                               | 3   | 1                               |
| Missense                   | 71             | 1    | c.211G>C                  | p.A71P                    | LRR N-flank                | -2                       | 0                         | 5                            | 0                               |                             | 3                               | 3   | 1                               |
| Missense                   | 74             | 2    | c.221T>A                  | p.V74D                    | LRR                        | 6                        | 6                         | 0                            | 0                               |                             | 12                              | 2   | 1                               |
| Missense                   | 101            | 2    | c.301A>G                  | p.N101D                   | LRR                        | 2                        | 6                         | 0                            | 1                               |                             | 9                               | 2   | 1                               |
| Missense                   | 101            | 3    | c.303C>G                  | p.N101K                   | LRR                        | 6                        | 6                         | 0                            | 1                               |                             | 13                              | 2   | 1                               |
| Missense                   | 117            | 3    | c.350T>C                  | p.L117S                   | LRR                        | 7                        | 6                         | 0                            | 0                               |                             | 13                              | 2   | 1                               |
| Missense                   | 120            | 3    | c.359T>C                  | p.I120T                   | LRR                        | 6                        | 6                         | 0                            | 0                               |                             | 12                              | 2   | 1                               |
| Missense                   | 140            | 4    | c.419C>A                  | p.A140E                   | LRR C-flank                | -2                       | 0                         | 5                            | 0                               |                             | 3                               | 3   | 1                               |
| Missense                   | 222            | 5    | c.665C>A                  | p.A222E                   | WSC                        | 3                        | 3                         | 0                            | 0                               |                             | 6                               | 3   | 1                               |
| Missense                   | 230            | 5    | c.688T>A                  | p.C230S                   | WSC                        | 6                        | 6                         | 0                            | 0                               |                             | 12                              | 2   | 1                               |
| Missense                   | 259            | 5    | c.776G>A                  | p.C259Y                   | WSC                        | 8                        | 6                         | 0                            | 0                               |                             | 14                              | 2   | 1                               |
| Missense                   | 325            | 5    | c.974A>G                  | p.Y325C                   | PKD-I                      | 8                        | 4                         | 2                            | 0                               |                             | 14                              | 2   | 2                               |
| Missense                   | 381            | 5    | c.1141G>A                 | p.G381S                   | ND                         | 5                        | 0                         | 0                            | 1                               |                             | 6                               | 3   | 4                               |
| Missense                   | 421            | 6    | c.1261C>T                 | p.R421C                   | C-type lectin              | 6                        | 0                         | 2                            | 0                               |                             | 8                               | 2   | 1                               |
| Missense                   | 432            | 6    | c.1294G>A                 | p.A432V                   | C-type lectin              | 5                        | 2                         | 0                            | 1                               |                             | 8                               | 2   | 3                               |
| Missense                   | 432            | 6    | c.1294G>A                 | p.A432T                   | C-type lectin              | 5                        | 2                         | 0                            | 1                               |                             | 8                               | 2   | 1                               |
| Missense                   | 436            | 6    | c.1307G>A                 | p.C436Y                   | C-type lectin              | 8                        | 6                         | 0                            | 1                               |                             | 15                              | 2   | 2                               |

| Mutation Type <sup>1</sup> | Codon Position | Exon | Mutation Designation (nt) | Mutation Designation (aa) | Domain/Region <sup>2</sup> | GV/GD score <sup>3</sup> | Domain score <sup>4</sup> | Structure score <sup>5</sup> | Recurrent AA score <sup>6</sup> | Splicing score <sup>7</sup> | Substitution Score <sup>8</sup> | MSG | Frequency in study <sup>9</sup> |
|----------------------------|----------------|------|---------------------------|---------------------------|----------------------------|--------------------------|---------------------------|------------------------------|---------------------------------|-----------------------------|---------------------------------|-----|---------------------------------|
| Missense                   | 444            | 6    | c.1331T>C                 | p.L444P                   | C-type lectin              | 6                        | 4                         | 0                            | 0                               |                             | 10                              | 2   | 1                               |
| Missense                   | 445            | 6    | c.1334C>A                 | p.A445E                   | C-type lectin              | 6                        | 0                         | 0                            | 0                               |                             | 6                               | 3   | 1                               |
| Missense                   | 458            | 5    | c.1373C>G                 | p.S458C                   | C-type lectin              | 3                        | 0                         | 2                            | 0                               |                             | 5                               | 3   | 1                               |
| Missense                   | 459            | 6    | c.1376G>C                 | p.R459P                   | C-type lectin              | 3                        | 0                         | 2                            | 0                               |                             | 5                               | 3   | 1                               |
| Missense                   | 466            | 7    | c.1397T>A                 | p.V466E                   | C-type lectin              | 5                        | 0                         | 0                            | 0                               |                             | 5                               | 3   | 1                               |
| Missense                   | 508            | 7    | c.1522T>C                 | p.C508R                   | C-type lectin              | 8                        | 6                         | 0                            | 0                               |                             | 14                              | 2   | 2                               |
| Missense                   | 510            | 7    | c.1529G>C                 | p.R510P                   | C-type lectin              | -2                       | 0                         | 5                            | 0                               |                             | 3                               | 3   | 2                               |
| Missense                   | 515            | 7    | c.1543G>A                 | p.G515R                   | C-type lectin              | 3                        | 4                         | 0                            | 1                               |                             | 7                               | 3   | 1                               |
| Missense                   | 605            | 9    | c.1814T>G                 | p.L605R                   | ND                         | 5                        | 0                         | 0                            | 0                               |                             | 5                               | 3   | 1                               |
| Missense                   | 611            | 9    | c.1831C>T                 | p.R611W                   | ND                         | 6                        | 0                         | 0                            | 0                               |                             | 6                               | 3   | 3                               |
| Missense                   | 690            | 10   | c.2069T>G                 | p.V690G                   | ND                         | 5                        | 0                         | 0                            | 1                               |                             | 6                               | 3   | 1                               |
| Missense                   | 727            | 11   | c.2180T>C                 | p.L727P                   | ND                         | 6                        | 0                         | 0                            | 2                               |                             | 6                               | 3   | 10                              |
| Missense                   | 845            | 11   | c.2534T>C                 | p.L845S                   | ND                         | 6                        | 0                         | 0                            | 0                               |                             | 6                               | 3   | 1                               |
| Missense                   | 960            | 12   | c.2879G>A                 | p.G960D                   | PKD-II                     | 6                        | 2                         | 0                            | 1                               |                             | 8                               | 2   | 1                               |
| Missense                   | 960            | 12   | c.2879G>T                 | p.G960V                   | PKD-II                     | 6                        | 2                         | 0                            | 1                               |                             | 8                               | 2   | 1                               |
| Missense                   | 967            | 12   | c.2899T>C                 | p.W967R                   | PKD-II                     | 6                        | 6                         | 0                            | 0                               |                             | 12                              | 2   | 1                               |
| Missense                   | 1181           | 15   | c.3542A>G                 | p.Y1181C                  | PKD-III                    | 8                        | 4                         | 2                            | 0                               |                             | 14                              | 2   | 1                               |
| Missense                   | 1243           | 15   | c.3729G>C                 | p.W1243C                  | PKD-IV                     | 8                        | 6                         | 2                            | 0                               |                             | 16                              | 2   | 1                               |
| Missense                   | 1328           | 15   | c.3982T>C                 | p.W1328R                  | PKD-V                      | 6                        | 6                         | 0                            | 0                               |                             | 12                              | 2   | 1                               |
| Missense                   | 1329           | 15   | c.3985A>C                 | p.T1329P                  | PKD-V                      | -2                       | 0                         | 5                            | 0                               |                             | 3                               | 3   | 1                               |
| Missense                   | 1400           | 15   | c.4199T>C                 | p.L1400P                  | PKD-VI                     | 5                        | 0                         | 0                            | 0                               |                             | 5                               | 3   | 1                               |
| Missense                   | 1412           | 15   | c.4234T>G                 | p.Y1412D                  | PKD-VI                     | 7                        | 2                         | 0                            | 0                               |                             | 9                               | 2   | 1                               |
| Missense                   | 1499           | 15   | c.4496T>TC                | p.L1499P                  | PKD-VII                    | -2                       | 0                         | 5                            | 0                               |                             | 3                               | 3   | 1                               |
| Missense                   | 1503           | 15   | c.4507G>C                 | p.G1503R                  | PKD-VII                    | 6                        | 0                         | 0                            | 0                               |                             | 6                               | 3   | 2                               |
| Missense                   | 1654           | 15   | c.4961C>A                 | p.A1654D                  | PKD-IX                     | 6                        | 0                         | 0                            | 0                               |                             | 6                               | 3   | 1                               |
| Missense                   | 1837           | 15   | c.5509T>C                 | p.W1837R                  | PKD-XI                     | 6                        | 2                         | 0                            | 0                               |                             | 8                               | 2   | 1                               |
| Missense                   | 1839           | 15   | c.5516G>T                 | p.W1839L                  | PKD-XI                     | 5                        | 6                         | 0                            | 1                               |                             | 12                              | 2   | 1                               |
| Missense                   | 1839           | 15   | c.5515T>C                 | p.W1839R                  | PKD-XI                     | 6                        | 6                         | 0                            | 1                               |                             | 13                              | 2   | 1                               |
| Missense                   | 1870           | 15   | c.5608A>C                 | p.N1870H                  | PKD-XII                    | 5                        | 4                         | 0                            | 3                               |                             | 12                              | 2   | 1                               |
| Missense                   | 1870           | 15   | c.5609A>T                 | p.N1870I                  | PKD-XII                    | 7                        | 4                         | 0                            | 3                               |                             | 14                              | 2   | 1                               |
| Missense                   | 1992           | 15   | c.5975T>C                 | p.F1992S                  | PKD-XIII                   | 6                        | 0                         | 0                            | 0                               |                             | 6                               | 3   | 1                               |
| Missense                   | 1999           | 15   | c.5995G>A                 | p.G1999S                  | PKD-XIV                    | 5                        | 2                         | 0                            | 3                               |                             | 10                              | 2   | 2                               |
| Missense                   | 1999           | 15   | c.5996G>C                 | p.G1999A                  | PKD-XIV                    | 5                        | 2                         | 0                            | 3                               |                             | 10                              | 2   | 1                               |
| Missense                   | 2051           | 15   | c.6152G>C                 | p.R2051P                  | PKD-XV                     | -2                       | 0                         | 5                            | 1                               |                             | 4                               | 3   | 1                               |
| Missense                   | 2053           | 15   | c.6158T>C                 | p.L2053P                  | PKD-XV                     | -2                       | 2                         | 5                            | 0                               |                             | 5                               | 3   | 1                               |
| Missense                   | 2114           | 15   | c.6341A>G                 | p.Y2114C                  | PKD-XVI                    | 8                        | 2                         | 2                            | 0                               |                             | 12                              | 2   | 1                               |
| Missense                   | 2187           | 15   | c.6559T>C                 | p.W2187R                  | REJ                        | 6                        | 4                         | 0                            | 0                               |                             | 10                              | 2   | 1                               |
| Missense                   | 2213           | 15   | c.6638G>C                 | p.R2213P                  | REJ                        | 6                        | 0                         | 2                            | 1                               |                             | 8                               | 2   | 1                               |
| Missense                   | 2215           | 15   | c.6643C>T                 | p.R2215W                  | REJ                        | 3                        | 0                         | 0                            | 0                               |                             | 3                               | 3   | 4                               |
| Missense                   | 2278           | 15   | c.6832G>A                 | p.G2278R                  | REJ                        | 3                        | 4                         | 0                            | 0                               |                             | 7                               | 3   | 1                               |
| Missense                   | 2297           | 15   | c.6890A>C                 | p.H2297P                  | REJ                        | 4                        | 0                         | 0                            | 0                               |                             | 4                               | 3   | 1                               |
| Missense                   | 2313           | 16   | c.6937C>G                 | p.L2313V                  | REJ                        | 2                        | 0                         | 0                            | 0                               |                             | 2                               | 3   | 1                               |
| Missense                   | 2370           | 17   | c.7108T>A                 | p.C2370S                  | REJ                        | 6                        | 4                         | 0                            | 1                               |                             | 11                              | 2   | 2                               |
| Missense                   | 2372           | 17   | c.7115C>T                 | p.S2372F                  | REJ                        | 7                        | 2                         | 0                            | 2                               |                             | 11                              | 2   | 2                               |
| Missense                   | 2373           | 17   | c.7118G>A                 | p.C2373Y                  | REJ                        | 8                        | 4                         | 0                            | 0                               |                             | 12                              | 2   | 1                               |
| Missense                   | 2392           | 17   | c.7175G>C                 | p.R2392P                  | REJ                        | 3                        | 0                         | 0                            | 0                               |                             | 3                               | 3   | 1                               |
| Missense                   | 2423           | 18   | c.7268C>T                 | p.S2423F                  | REJ                        | 4                        | 0                         | 0                            | 0                               |                             | 4                               | 3   | 1                               |
| Missense                   | 2434           | 18   | c.7300C>T                 | p.R2434W                  | REJ                        | 6                        | 2                         | 0                            | 1                               |                             | 9                               | 2   | 1                               |
| Missense                   | 2459           | 18   | c.7376G>A                 | p.G2459D                  | REJ                        | 6                        | 0                         | 0                            | 0                               |                             | 6                               | 3   | 1                               |
| Missense                   | 2516           | 19   | c.7546C>T                 | p.R2516C                  | REJ                        | 8                        | 0                         | 2                            | 0                               |                             | 10                              | 2   | 4                               |

| Mutation Type <sup>1</sup> | Codon Position | Exon | Mutation Designation (nt) | Mutation Designation (aa) | Domain/Region <sup>2</sup> | GV/GD score <sup>3</sup> | Domain score <sup>4</sup> | Structure score <sup>5</sup> | Recurrent AA score <sup>6</sup> | Splicing score <sup>7</sup> | Substitution Score <sup>8</sup> | MSG | Frequency in study <sup>9</sup> |
|----------------------------|----------------|------|---------------------------|---------------------------|----------------------------|--------------------------|---------------------------|------------------------------|---------------------------------|-----------------------------|---------------------------------|-----|---------------------------------|
| Missense                   | 2643           | 21   | c.7928G>C                 | p.R2643P                  | REJ                        | 6                        | 4                         | 0                            | 1                               |                             | 11                              | 2   | 1                               |
| Missense                   | 2660           | 21   | c.7978 G>A                | p.D2660N                  | REJ                        | 2                        | 0                         | 0                            | 0                               |                             | 2                               | 3   | 1                               |
| Missense                   | 2723           | 23   | c.8168T>C                 | p.L2723P                  | REJ                        | 6                        | 4                         | 0                            | 0                               |                             | 10                              | 2   | 1                               |
| Missense                   | 2759           | 23   | c.8276T>C                 | p.L2759P                  | REJ                        | 6                        | 2                         | 0                            | 0                               |                             | 8                               | 2   | 1                               |
| Missense                   | 2764           | 23   | c.8291T>A                 | p.M2764K                  | REJ                        | 6                        | 0                         | 0                            | 0                               |                             | 6                               | 3   | 1                               |
| Missense                   | 2767           | 23   | c.8299C>T                 | p.R2767C                  | REJ                        | 8                        | 2                         | 2                            | 0                               |                             | 12                              | 2   | 2                               |
| Missense                   | 2768           | 23   | c.8302G>A                 | p.V2768M                  | GAIN                       | 2                        | 0                         | 0                            | 0                               |                             | 2                               | 3   | 1                               |
| Missense                   | 2771           | 23   | c.8311G>A                 | p.E2771K                  | GAIN                       | 5                        | 0                         | 6                            | 0                               |                             | 11                              | 2   | 9                               |
| Missense                   | 2785           | 23   | c.8354G>A                 | p.G2785D                  | GAIN                       | 6                        | 0                         | 0                            | 0                               |                             | 6                               | 3   | 1                               |
| Missense                   | 2786           | 23   | c.8358G>C                 | p.K2786N                  | GAIN                       | 6                        | 0                         | 0                            | 1                               |                             | 7                               | 3   | 1                               |
| Missense                   | 2809           | 23   | c.8426C>T                 | p.P2809L                  | GAIN                       | 6                        | 0                         | 0                            | 0                               |                             | 6                               | 3   | 2                               |
| Missense                   | 2833           | 23   | c.8497C>T                 | p.P2833S                  | GAIN                       | 5                        | 0                         | 0                            | 0                               |                             | 5                               | 3   | 2                               |
| Missense                   | 2850           | 23   | c.8548T>C                 | p.S2850P                  | GAIN                       | 5                        | 0                         | 0                            | 0                               |                             | 5                               | 3   | 2                               |
| Missense                   | 2866           | 23   | c.8597T>C                 | p.L2866P                  | GAIN                       | 6                        | 0                         | 0                            | 0                               |                             | 6                               | 3   | 1                               |
| Missense                   | 3007           | 25   | c.9019T>C                 | p.S3007P                  | GAIN                       | -2                       | 0                         | 4                            | 0                               |                             | 2                               | 3   | 1                               |
| Missense                   | 3030           | 25   | c.9088C>T, 9089T>G        | p.L3030W                  | GPS                        | 4                        | 0                         | 0                            | 0                               |                             | 4                               | 3   | 1                               |
| Missense                   | 3036           | 25   | c.9107C>T                 | p.T3036I                  | GPS                        | 6                        | 2                         | 0                            | 0                               |                             | 8                               | 2   | 1                               |
| Missense                   | 3049           | 25   | c.9146C>T                 | p.T3049I                  | GPS                        | 6                        | 2                         | 0                            | 0                               |                             | 8                               | 2   | 1                               |
| Missense                   | 3053           | 25   | c.9157G>A                 | p.A3053T                  | GPS                        | 5                        | 0                         | 0                            | 0                               |                             | 5                               | 3   | 1                               |
| Missense                   | 3054           | 25   | c.9161G>T                 | p.S3054I                  | GPS                        | 4                        | 0                         | 0                            | 0                               |                             | 4                               | 3   | 1                               |
| Missense                   | 3095           | 26   | c.9284T>C                 | p.L3095P                  | TM1                        | 5                        | 2                         | 4                            | 0                               |                             | 11                              | 2   | 1                               |
| Missense                   | 3126           | 26   | c.9376A>C                 | p.T3126P                  | PLAT                       | 5                        | 4                         | 0                            | 1                               |                             | 10                              | 2   | 1                               |
| Missense                   | 3126           | 26   | c.9377C>T                 | p.T3126I                  | PLAT                       | 6                        | 4                         | 0                            | 1                               |                             | 11                              | 2   | 1                               |
| Missense                   | 3127           | 26   | c.9379G>T                 | p.G3127C                  | PLAT                       | 7                        | 4                         | 0                            | 0                               |                             | 11                              | 2   | 1                               |
| Missense                   | 3135           | 27   | c.9404C>T                 | p.T3135M                  | PLAT                       | 6                        | 2                         | 0                            | 0                               |                             | 8                               | 2   | 2                               |
| Missense                   | 3137           | 27   | c.9411C>G                 | p.H3137Q                  | PLAT                       | 2                        | 0                         | 0                            | 1                               |                             | 3                               | 3   | 1                               |
| Missense                   | 3138           | 27   | c.9413T>A                 | p.V3138E                  | PLAT                       | 6                        | 4                         | 0                            | 2                               |                             | 12                              | 2   | 1                               |
| Missense                   | 3139           | 27   | c.9416G>T                 | p.G3139V                  | PLAT                       | 6                        | 0                         | 0                            | 0                               |                             | 6                               | 3   | 1                               |
| Missense                   | 3152           | 27   | c.9454C>G                 | p.R3152G                  | PLAT                       | 6                        | 0                         | 0                            | 0                               |                             | 6                               | 3   | 1                               |
| Missense                   | 3162           | 27   | c.9485G>T                 | p.R3162L                  | PLAT                       | 6                        | 2                         | 0                            | 0                               |                             | 8                               | 2   | 1                               |
| Missense                   | 3168           | 27   | c.9504C>G                 | p.F3168L                  | PLAT                       | 2                        | 4                         | 0                            | 2                               |                             | 6                               | 3   | 1                               |
| Missense                   | 3171           | 27   | c.9511G>C                 | p.A3171P                  | PLAT                       | 2                        | 0                         | 0                            | 0                               |                             | 2                               | 3   | 1                               |
| Missense                   | 3186           | 27   | c.9556C>T                 | p.H3186Y                  | PLAT                       | 6                        | 4                         | 0                            | 1                               |                             | 11                              | 2   | 2                               |
| Missense                   | 3194           | 28   | c.9581C>T                 | p.A3194V                  | PLAT                       | -3                       | 0                         | 3                            | 0                               |                             | 0                               | 3   | 1                               |
| Missense                   | 3200           | 28   | c.9598G>T                 | p.V3200F                  | PLAT                       | 4                        | 2                         | 0                            | 0                               |                             | 6                               | 3   | 1                               |
| Missense                   | 3216           | 28   | c.9647A>T                 | p.N3216I                  | PLAT                       | 4                        | 2                         | 0                            | 0                               |                             | 6                               | 3   | 2                               |
| Missense                   | 3263           | 29   | c.9787T>C                 | p.W3263R                  | InL1                       | 6                        | 4                         | 0                            | 1                               |                             | 11                              | 2   | 1                               |
| Missense                   | 3264           | 29   | c.9791T>G                 | p.L3264R                  | InL1                       | 6                        | 2                         | 0                            | 0                               |                             | 8                               | 2   | 1                               |
| Missense                   | 3283           | 29   | c.9847T>C                 | p.C3283R                  | TM2                        | 8                        | 4                         | 0                            | 0                               |                             | 12                              | 2   | 1                               |
| Missense                   | 3326           | 30   | c.9977G>A                 | p.G3326D                  | TM3                        | 6                        | 4                         | 0                            | 2                               |                             | 12                              | 2   | 1                               |
| Missense                   | 3469           | 33   | c.10405G>A                | p.D3469N                  | InL2                       | 2                        | 0                         | 0                            | 1                               |                             | 3                               | 3   | 2                               |
| Missense                   | 3469           | 33   | c.10405G>T                | p.D3469Y                  | InL2                       | 7                        | 0                         | 0                            | 1                               |                             | 8                               | 2   | 1                               |
| Missense                   | 3561           | 36   | c.10682T>G                | p.L3561R                  | TM4                        | -2                       | 2                         | 4                            | 0                               |                             | 4                               | 3   | 1                               |
| Missense                   | 3599           | 36   | c.10796C>T                | p.S3599L                  | TM5                        | 7                        | 2                         | 0                            | 0                               |                             | 9                               | 2   | 1                               |
| Missense                   | 3604           | 35   | c.10810G>C                | p.E3604Q                  | InL3                       | 2                        | 0                         | 0                            | 1                               |                             | 3                               | 3   | 1                               |
| Missense                   | 3604           | 36   | c.10810G>A                | p.E3604K                  | InL3                       | 5                        | 0                         | 0                            | 1                               |                             | 6                               | 3   | 1                               |
| Missense                   | 3651           | 37   | c.10951G>A                | p.G3651S                  | InL3                       | 5                        | 0                         | 0                            | 1                               |                             | 6                               | 3   | 3                               |
| Missense                   | 3653           | 37   | c.10958C>T                | p.A3653V                  | InL3                       | 5                        | 0                         | 0                            | 0                               |                             | 5                               | 3   | 1                               |
| Missense                   | 3654           | 37   | c.10960C>CG               | p.L3654V                  | InL3                       | 2                        | 0                         | 0                            | 0                               |                             | 2                               | 3   | 1                               |
| Missense                   | 3657           | 37   | c.10970C>T                | p.A3657V                  | InL3                       | 5                        | 0                         | 0                            | 1                               |                             | 6                               | 3   | 1                               |

| Mutation Type <sup>1</sup> | Codon Position | Exon  | Mutation Designation (nt) | Mutation Designation (aa) | Domain/Region <sup>2</sup> | GV/GD score <sup>3</sup> | Domain score <sup>4</sup> | Structure score <sup>5</sup> | Recurrent AA score <sup>6</sup> | Splicing score <sup>7</sup> | Substitution Score <sup>8</sup> | MSG | Frequency in study <sup>9</sup> |
|----------------------------|----------------|-------|---------------------------|---------------------------|----------------------------|--------------------------|---------------------------|------------------------------|---------------------------------|-----------------------------|---------------------------------|-----|---------------------------------|
| Missense                   | 3678           | 38    | c.11033T>G                | p.M3678R                  | TM6                        | 6                        | 2                         | 4                            | 0                               |                             | 12                              | 2   | 1                               |
| Missense                   | 3682           | 38    | c.11045T>A                | p.L3682Q                  | TM6                        | 5                        | 2                         | 0                            | 0                               |                             | 7                               | 3   | 1                               |
| Missense                   | 3727           | 39    | c.11180T>TA               | p.M3727K                  | ExL3                       | 5                        | 2                         | 0                            | 0                               |                             | 7                               | 3   | 1                               |
| Missense                   | 3750           | 39    | c.11249G>A                | p.R3750Q                  | PC-A                       | 5                        | 6                         | 0                            | 1                               |                             | 12                              | 2   | 1                               |
| Missense                   | 3750           | 39    | c.11249G>C                | p.R3750P                  | PC-A                       | 6                        | 6                         | 0                            | 1                               |                             | 13                              | 2   | 1                               |
| Missense                   | 3753           | 39    | c.11258G>A                | p.R3753Q                  | PC-A                       | 5                        | 6                         | 0                            | 2                               |                             | 13                              | 2   | 2                               |
| Missense                   | 3753           | 39    | c.11257C>T                | p.R3753W                  | PC-A                       | 6                        | 6                         | 0                            | 2                               |                             | 14                              | 2   | 1                               |
| Missense                   | 3818           | 40    | c.11452G>A                | p.G3818S                  | PC-B                       | 5                        | 6                         | 0                            | 2                               |                             | 13                              | 2   | 1                               |
| Missense                   | 3818           | 41    | c.11453G>T                | p.G3818V                  | PC-B                       | 6                        | 6                         | 0                            | 2                               |                             | 14                              | 2   | 2                               |
| Missense                   | 3818           | 41    | c.11452G>C                | p.G3818R                  | PC-B                       | 6                        | 6                         | 0                            | 2                               |                             | 14                              | 2   | 1                               |
| Missense                   | 3834           | 41    | c.11501T>G                | p.L3834R                  | PC-B                       | 6                        | 2                         | 0                            | 0                               |                             | 8                               | 2   | 1                               |
| Missense                   | 3842           | 41    | c.11524T>C                | p.W3842R                  | PC-B                       | 6                        | 6                         | 0                            | 1                               |                             | 13                              | 2   | 2                               |
| Missense                   | 3885           | 42    | c.11654T>G                | p.V3885G                  | ExL3                       | 6                        | 2                         | 0                            | 0                               |                             | 8                               | 2   | 1                               |
| Missense                   | 3908           | 43    | c.11723T>G                | p.L3908R                  | TM7                        | 5                        | 0                         | 0                            | 0                               |                             | 5                               | 3   | 1                               |
| Missense                   | 4137           | 45    | c.12410T>C                | p.L4137P                  | GPPAS                      | 6                        | 0                         | 2                            | 0                               |                             | 8                               | 2   | 1                               |
| Missense                   | 4139           | 45    | c.12416T>C                | p.L4139P                  | GPPAS                      | 5                        | 0                         | 2                            | 0                               |                             | 7                               | 3   | 1                               |
| Missense                   | 4150           | 46    | c.12448C>T                | p.R4150C                  | GPPAS                      | 8                        | 2                         | 0                            | 0                               |                             | 10                              | 2   | 2                               |
| Missense                   | 4155           | 46    | c.12463T>C                | p.F4155L                  | C-tail                     | 2                        | 0                         | 0                            | 2                               |                             | 4                               | 3   | 1                               |
| Missense                   | 4155           | 46    | c.12463T>G                | p.F4155V                  | C-tail                     | 5                        | 0                         | 0                            | 2                               |                             | 7                               | 3   | 1                               |
| Missense                   | 4155           | 46    | c.12464T>C                | p.F4155S                  | C-tail                     | 7                        | 0                         | 0                            | 2                               |                             | 9                               | 2   | 1                               |
| Splice                     | 120            | IVS3  | c.359+3A>T                | p.I120fs                  |                            |                          |                           |                              |                                 | 7                           | 7                               | 3   | 1                               |
| Splice                     | 120            | IVS3  | c.359+2dupT               | p.I120fs                  |                            |                          |                           |                              |                                 | 8                           | 8                               | 2   | 1                               |
| Splice                     | 120            | IVS3  | c.359+5G>T                | p.I120fs                  |                            |                          |                           |                              |                                 | 8                           | 8                               | 2   | 1                               |
| Splice                     | 177            | IVS4  | c.529+3G>C                | p.G177fs                  |                            |                          |                           |                              |                                 | 7                           | 7                               | 3   | 1                               |
| Splice                     | 401            | IVS5  | c.1202-9G>A               | p.A401fs                  |                            |                          |                           |                              |                                 | 8*                          | 8                               | 2   | 3                               |
| Splice                     | 609            | 9     | c.1827G>A                 | p.V609fs                  |                            |                          |                           |                              |                                 | 6*                          | 6                               | 3   | 1                               |
| Splice                     | 952            | IVS11 | c.2853+5G>A               | p.R952fs                  |                            |                          |                           |                              |                                 | 4                           | 4                               | 3   | 1                               |
| Splice                     | 1054           | IVS13 | c.3161+5_+8del4           | p.L1054fs                 |                            |                          |                           |                              |                                 | 8*#                         | 8                               | 2   | 1                               |
| Splice                     | 2306           | IVS15 | c.6916-10C>A              | p.R2306fs                 |                            |                          |                           |                              |                                 | 10*#                        | 10                              | 2   | 1                               |
| Splice                     | 2306           | IVS15 | c.6916-9G>A               | p.R2306fs                 |                            |                          |                           |                              |                                 | 10*#                        | 10                              | 2   | 5                               |
| Splice                     | 2404           | IVS17 | c.7209+4_+7delAGTG        | p.R2404fs                 |                            |                          |                           |                              |                                 | 10#                         | 10                              | 2   | 2                               |
| Splice                     | 2931           | IVS23 | c.8791+5G>C               | p.G2931fs                 |                            |                          |                           |                              |                                 | 8                           | 8                               | 2   | 1                               |
| Splice                     | 3068           | IVS25 | c.9202-16G>A              | p.E3068fs                 |                            |                          |                           |                              |                                 | 8*#                         | 8                               | 2   | 1                               |
| Splice                     | 3389           | IVS31 | c.10167+25_+43del19       | p.Q3390fs                 |                            |                          |                           |                              |                                 | 8#                          | 8                               | 2   | 1                               |
| Splice                     | 3540           | IVS35 | c.10618+19_+28del10       | p.G3540fs                 |                            |                          |                           |                              |                                 | 6                           | 6                               | 3   | 1                               |
| Splice                     | 3673           | IVS37 | c.11017-10C>A             | p.S3673fs                 |                            |                          |                           |                              |                                 | 6#                          | 6                               | 3   | 4                               |
| Splice                     | 3719           | 38    | c.11156G>A                | p.R3719fs                 |                            |                          |                           |                              |                                 | 8                           | 8                               | 2   | 2                               |
| Splice                     | 3719           | IVS38 | c.11156+5G>C              | p.R3719fs                 |                            |                          |                           |                              |                                 | 8                           | 8                               | 2   | 1                               |
| Splice                     | 3956           | 43    | c.11866C>T                | p.L3956fs                 |                            |                          |                           |                              |                                 | 6*                          | 6                               | 3   | 1                               |
| Splice                     | 4002           | IVS43 | c.12003+14_+33del         | p.A4002fs                 |                            |                          |                           |                              |                                 | 6#                          | 6                               | 3   | 2                               |

1. Only small inframe deletion or insertion (InFrame D/I) mutations, four amino acids or less, and only atypical splicing mutations, those not mutating the canonical di-nucleotides flanking each exon, were considered non-truncating and evaluated for these two mutation types.
2. Domain information: Signal Peptide (SP), Leucine Rich Repeat (LRR), cell-Wall integrity and Stress-response Components 1-4 (WSC), Polycystic Kidney Disease protein repeat -# (PKD-#), Receptor for Egg Jelly (REJ), G-protein-coupled receptor Proteolytic Site (GPS), G-protein-coupled receptor-Autoproteolysis INducing (GAIN), Polycystin-1, Lipoxigenase, Alpha-Toxin (PLAT), Transmembrane # (TM#), Extracellular Loop # (ExL#), Intracellular Loop # (InL#), Polycystin Motif -A, or -B (PC-A, PC-B), G-Protein Peptide Activating Sequence (GPPAS), None Defined (ND).

3. GV/GD Score: Score derived from Grantham Variation (GV) and Grantham Difference (GD) values (see Concise Methods for details) (scale, -8 to +8 per amino acid)
4. Domain score: Score of conservation in the defined domain (scale, 0 to 6 per amino acid) (see Concise Methods for details)
5. Structure Score: Scores reflecting disrupted structure (scale, 0 to 5 per amino acid) (see Concise Methods for details)
6. Recurrent AA Score: Number of additional different mutant disruptions of this amino acid (AA) described
7. Splicing Score: Score derived from predictions using the Berkeley Drosophila Genome Project (BDGP) browser (scale, 0 to 10). \* = new cryptic splice site revealed, # = previous RT-PCR data showing altered slicing.
8. Substitution Score: Derived from summing the GV/GD, Domain, Structure, Recurrent AA and Splicing Scores
9. Frequency in Study: Number of families in the study with this mutation

Supp. Fig. 1

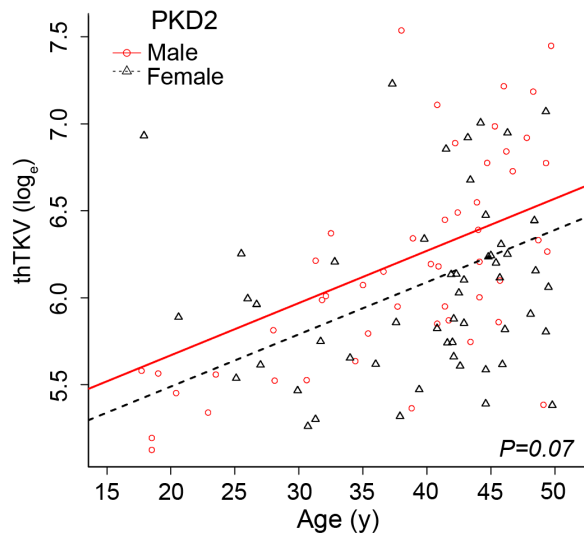

Supplemental Fig. 1. **Comparison of gender differences by htTKV in PKD2**  
This analysis shows a non-significant trend to smaller kidneys in females (Table 2).

Supp. Fig. 2

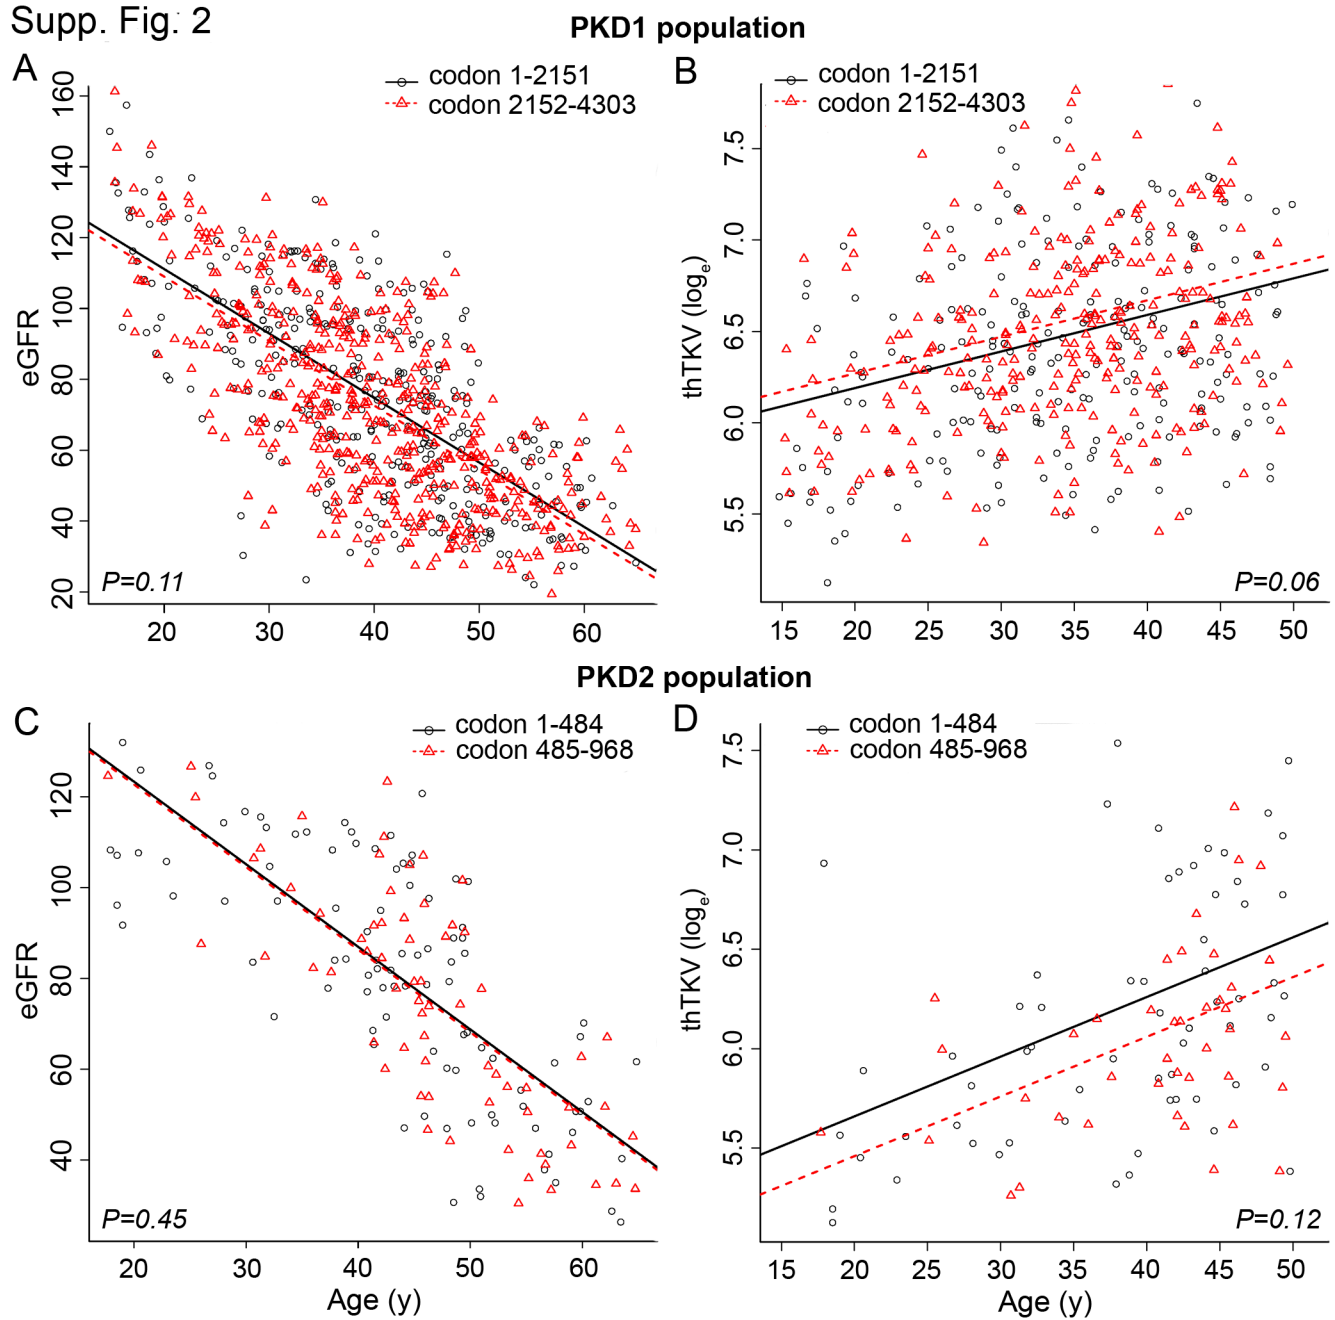

Supplemental Fig. 2. **Analyses of the significance of mutation position in PKD1 and PKD2 to renal disease severity**

PKD1 (A, B) and PKD2 (C, D) are assayed by eGFR (A, C) and htTKV (B, D). The positions of the mutations in *PKD1* and *PKD2* were divided at the midpoint of the coding region and are illustrated here as the codon position in the corresponding protein. No significant difference was seen between mutations 3' compared to 5' of the midpoint for *PKD1* with eGFR (A) or htTKV (B) and PKD2 with eGFR (C) or htTKV (D; Table 2).



Supp. Fig. 3

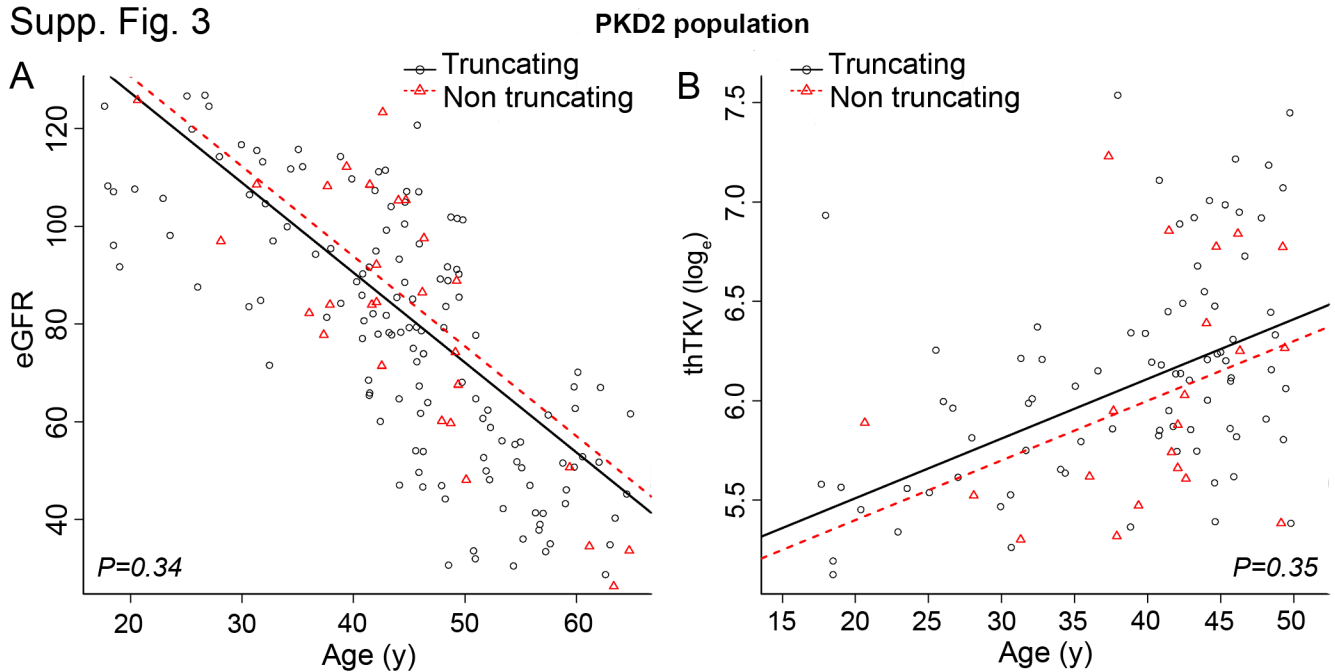

Supplemental Fig. 3. **Analyses of *PKD2* mutation type (truncating or non-truncating) and renal function** Neither by eGFR (A; non-truncating relative to truncating) or htTKV (B) was there a significant difference between the mutation types (Table 2).

Supp. Fig. 4

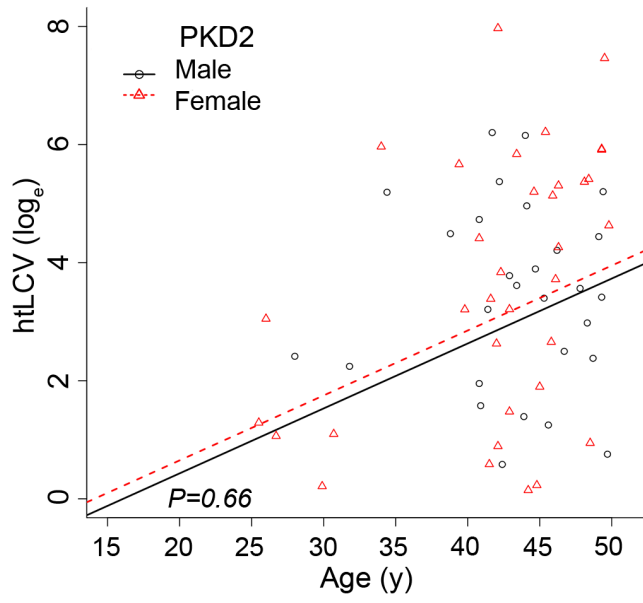

Supplemental Fig. 4. **Analysis of the PKD2 population shows that female htLCV is not significantly larger than males (Table 2).**

Supp. Fig. 5

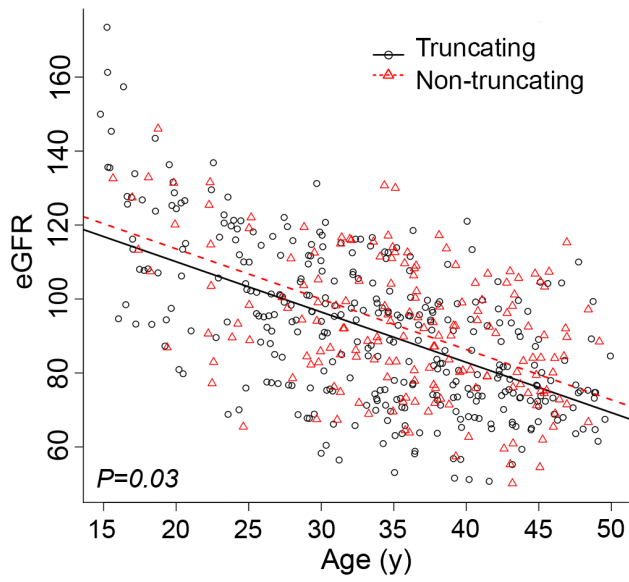

Supplemental Fig. 5. **Analysis of *PKD1* mutation type (truncating or non-truncating) by eGFR in the htTKV population** There was a significant eGFR difference in this population (n=663; Table 1 and 2), although htTKV was not significant in this population (Fig. 3D).
